# Supplementary material
Source: ML conference proceedings conference paper supplement (https://proceedings.neurips.cc/paper_files/paper/2018/hash/a981f2b708044d6fb4a71a1463242520-Abstract.html)
Supplement: Supplementary file [file a981f2b708044d6fb4a71a1463242520-Supplemental.zip]

## Appendix: Propositions for the Loss Function in (5)

**Proposition 1.** For any  $\alpha_{ij} \geq 1$ , the inequality  $\mathcal{L}_{ij}^{var} < \mathcal{L}_{ij}^{err}$  is satisfied.

**Proof.** Consider  $y_j = 0$ , then  $\mathcal{L}_{ij}^{err} = \alpha_{ij}^2 / S_i^2$ . As  $\frac{(S_i - \alpha_{ij})}{(S_i + 1)} < 1$  and  $\frac{\alpha_{ij}}{S_i^2} \leq \frac{\alpha_{ij}^2}{S_i^2}$  we get

$$\frac{\alpha_{ij}(S_i - \alpha_{ij})}{S_i^2(S_i + 1)} < \frac{\alpha_{ij}^2}{S_i^2}.$$

Now consider  $y_j = 1$ , then

$$\mathcal{L}_{ij}^{err} = \left(1 - \frac{\alpha_{ij}}{S_i}\right)^2 = \frac{(S_i - \alpha_{ij})^2}{S_i^2}.$$

As  $(S_i - \alpha_{ij}) > \alpha_{ij} / (S_i + 1)$ , we attain

$$\frac{\alpha_{ij}(S_i - \alpha_{ij})}{S_i^2(S_i + 1)} < \frac{(S_i - \alpha_{ij})^2}{S_i^2} \quad \blacksquare$$

**Proposition 2.** For a given sample  $i$  with the correct label  $j$ ,  $L_i^{err}$  decreases when new evidence is added to  $\alpha_{ij}$  and increases when evidence is removed from  $\alpha_{ij}$ .

**Proof.** Let  $\nu$  represent evidence to be added to the Dirichlet parameter  $\alpha_{ij}$ . Then,  $L_i^{err}$  is updated as

$$\hat{L}_i^{err} = \left(1 - \frac{\alpha_{ij} + \nu}{S_i + \nu}\right)^2 + \sum_{k \neq j} \left(\frac{\alpha_{ik}}{S_i + \nu}\right)^2$$

which is smaller than  $L_i^{err}$  for  $\nu > 0$ , since

$$\begin{aligned} \left(1 - \frac{\alpha_{ij} + \nu}{S_i + \nu}\right)^2 &< \left(1 - \frac{\alpha_{ij}}{S_i}\right)^2 \quad \text{and} \\ \sum_{k \neq j} \left(\frac{\alpha_{ik}}{S_i + \nu}\right)^2 &< \sum_{k \neq j} \left(\frac{\alpha_{ik}}{S_i}\right)^2 \end{aligned}$$

Similarly  $\hat{L}_i^{err}$  becomes greater than  $L_i^{err}$  when  $\nu < 0$   $\blacksquare$

**Proposition 3.** For a given sample  $i$  with the correct class label  $j$ ,  $L_i^{err}$  decreases when some evidence is removed from the biggest Dirichlet parameter  $\alpha_{il}$  such that  $l \neq j$ .

**Proof.** Let the expected value of the predicted Dirichlet distribution for the sample  $i$  be  $[\hat{p}_{i1}, \dots, \hat{p}_{iK}]$ . When some evidence is removed from  $\alpha_{il}$ ,  $\hat{p}_{il}$  decreases by  $\delta_{il} > 0$ . As a result,  $\hat{p}_{ik}$  for all  $k \neq l$  increases by  $\delta_{ik} > 0$  such that  $\sum_{k \neq l} \delta_{ik} = \delta_{il}$ , since the expected values must sum to one (2). Let  $\tilde{p}_{il}$  be the updated expected value for the  $l^{th}$  component of the Dirichlet distribution after the removal of evidence. Then,  $L_i^{err}$  before the removal of evidence can be written as

$$L_i^{err} = (1 - \hat{p}_{ij})^2 + \left(\tilde{p}_{il} + \sum_{k \neq l} \delta_{ik}\right)^2 + \sum_{k \notin \{j, l\}} \hat{p}_{ik}^2$$

and it is updated after the removal of evidence as

$$\tilde{L}_i^{err} = (1 - \hat{p}_{ij} - \delta_{ij})^2 + \tilde{p}_{ij}^2 + \sum_{k \notin \{j, l\}} (\hat{p}_{ik} + \delta_{ik})^2$$

the difference  $L_i^{err} - \tilde{L}_i^{err}$  becomes

$$\underbrace{2(1 - \hat{p}_{ij})\delta_{ij}}_{\geq 0} + 2\left(\tilde{p}_{il} \sum_{k \neq l} \delta_{ik} - \sum_{k \notin \{j, l\}} \hat{p}_{ik}\delta_{ik}\right) + \underbrace{\left(\left(\sum_{k \neq l} \delta_{ik}\right)^2 - \sum_{k \neq l} \delta_{ik}^2\right)}_{\geq 0},$$

which is always positive for  $\hat{p}_{il} > \tilde{p}_{il} \geq \hat{p}_{ik}$  (s.t.  $k \neq j$ ) and maximizes as  $\hat{p}_{il}$  increases  $\blacksquare$
